# Supplementary material for: Ferulic acid and protocatechuic acid alleviate atherosclerosis by promoting UCP1 expression to inhibit the NLRP3-IL-1β signaling pathway
Source: Royal Society of Chemistry journal article supplement (doi:10.1039/d4fo02955k), 2024-11-25
Supplement: d4fo02955k1.pdf [file d4fo02955k1.pdf]

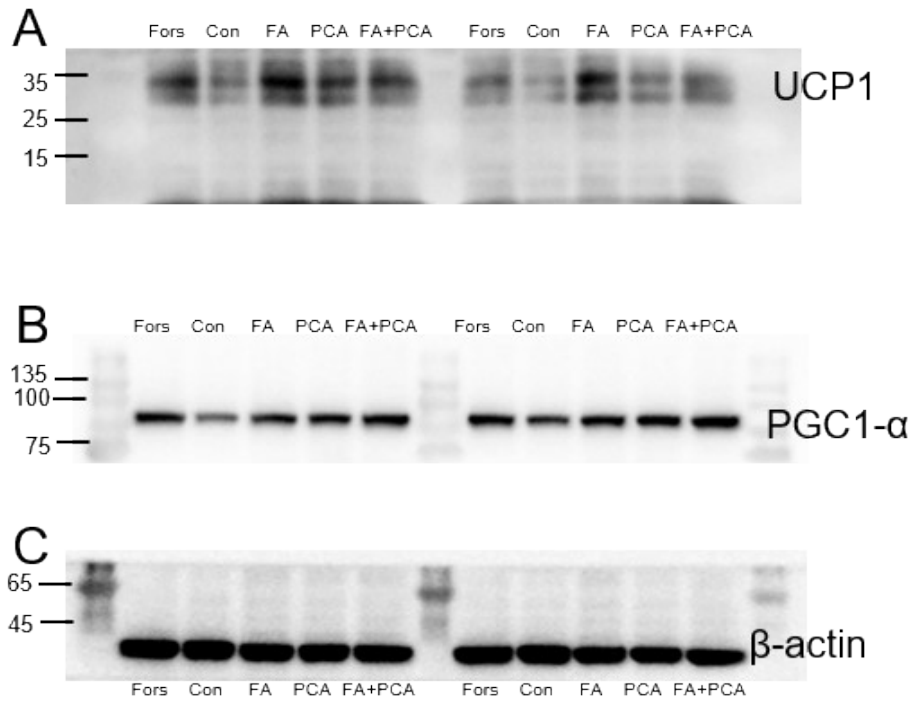

**Figure S1.** Raw images of the electrophoretic gels and blots in **Figure 1-N**.

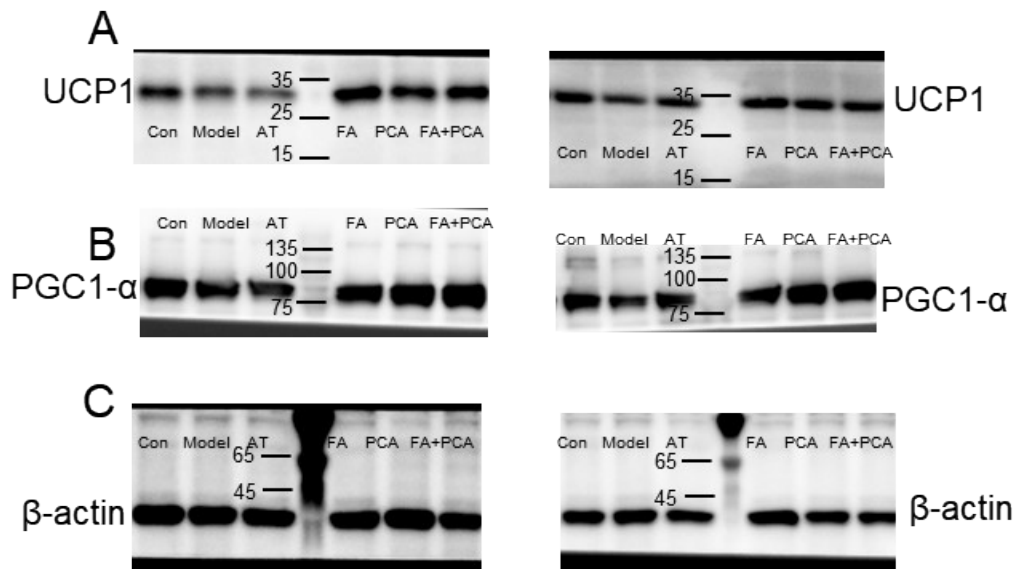

**Figure S2.** Raw images of the electrophoretic gels and blots in **Figure 4-F**.

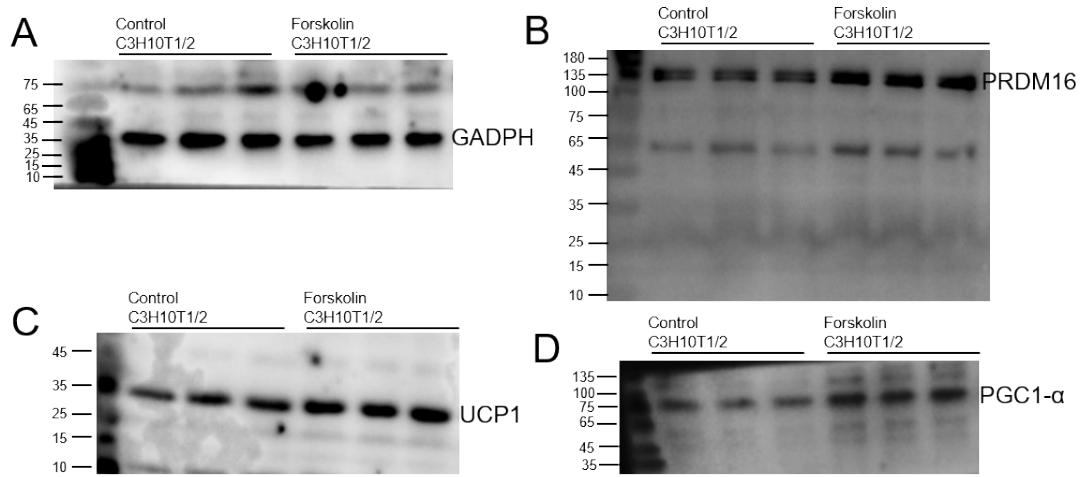

**Figure S3.** Raw images of the electrophoretic gels and blots in **Figure 6-C**.

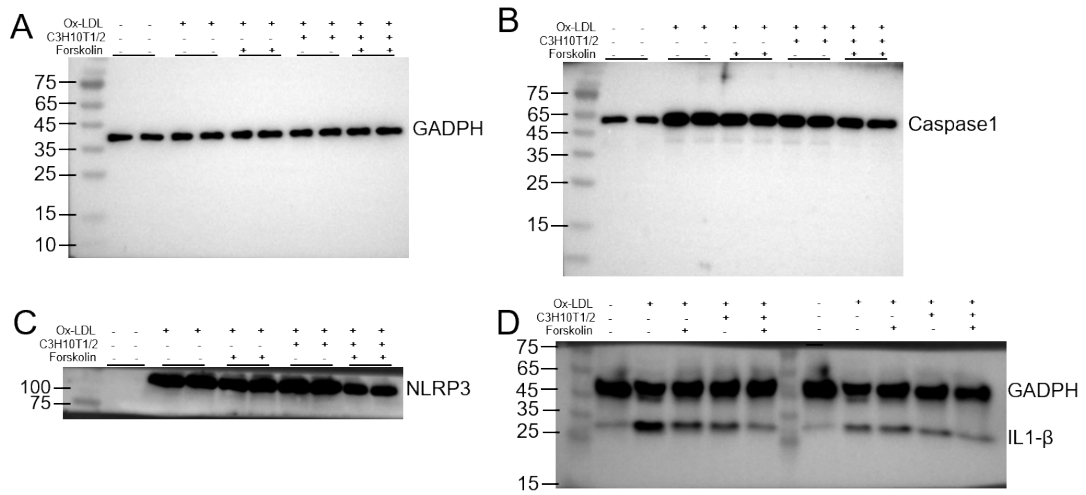

**Figure S4.** Raw images of the electrophoretic gels and blots in **Figure 6-E**.

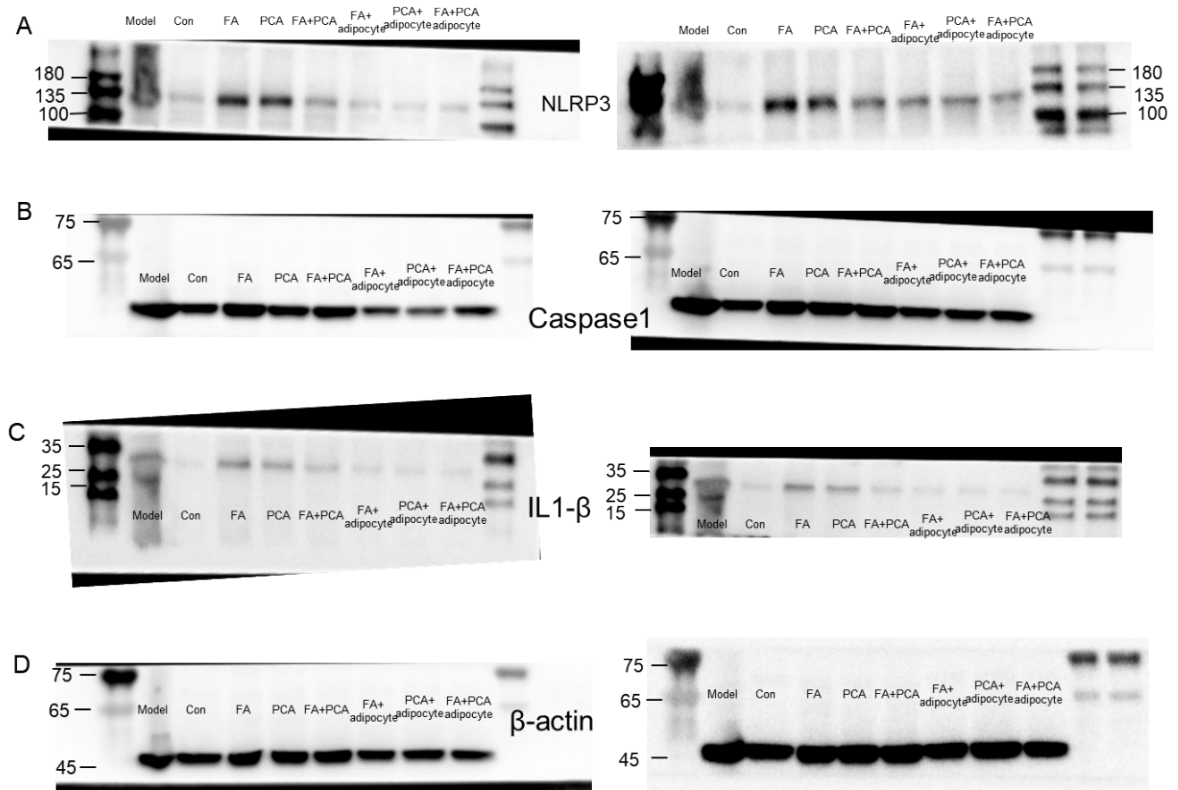

**Figure S5.** Raw images of the electrophoretic gels and blots in **Figure 6-G**.
